# Supplementary material for: Ligand regulation strategy of COF-based photocatalyst for ROS-mediated RAFT polymerization
Source: Royal Society of Chemistry journal article supplement (doi:10.1039/d3py00295k), 2023-01-01
Supplement: d3py00295k1.pdf [file d3py00295k1.pdf]

## Supporting information

### **Ligand regulated strategy of COF-based photocatalyst for ROS-mediated RAFT polymerization**

Zhen Lu,<sup>†a, b, d</sup> Hongjie Yang,<sup>†a, c</sup> Rui Zhao,<sup>b</sup> Yulai Zhao,<sup>a, b, c</sup> Longqiang Xiao,<sup>\*a, b, c</sup> and Linxi Hou<sup>\*a, b, c</sup>

<sup>a</sup>*Department of Materials-Oriented Chemical Engineering, School of Chemical Engineering, Fuzhou University, No. 2 Xueyuan Road, Fuzhou, 350116, P. R. China*

*Email: lxhou@fzu.edu.cn, xiaolq@fzu.edu.cn.*

<sup>b</sup>*Qingyuan Innovation Laboratory, Quanzhou, Quanzhou, 362801, P. R. China*

<sup>c</sup>*Fujian Key Laboratory of Advanced Manufacturing Technology of Specialty Chemicals, Fuzhou University, No. 2 Xueyuan Road, Fuzhou, 350116, P. R. China*

<sup>d</sup>*College of Chemistry, Fuzhou University, No. 2 Xueyuan Road, Fuzhou, 350116, P. R. China*

<sup>†</sup>These authors contributed equally to this work

## Materials

2,5-dimethoxy-terephthalaldehyde (DMTA), 4-aminobenzonitrile (>99%), 2,5-dihydroxyterephthalaldehyde (DHTA), 2-hydroxypropyl methacrylate (HPMA, 97%, stabilized with 4-methoxyphenol), poly(ethleneglycol) dimethacrylate (PEGMA, M=475 g/mol), 2-Hydroxypropyl methacrylate (HPMA), 2-iodo-2-methylpropionitrile (CP-I) were purchased from Aldrich, all monomer solution were passed through a neutral alumina column before used.

Light-emitting diode flex strip (15 mW cm<sup>-2</sup>) was purchased from Philips company and used as light source.

## Methods

<sup>1</sup>H NMR and solid <sup>13</sup>C NMR of materials were detected on Bruker Advance III. Ultraviolet-visible spectrum (UV-vis DRS) was recorded on Varian Cary 300 UV-vis spectrophotometer. Fourier transform infrared (FT-IR) spectra was collected on Thermo Scientific Nicolet i5. Powder X-ray diffraction (P-XRD) was measured by EmpyreanDY1602 with Cu K $\alpha$  radiation. The surface areas and pore size distribution of samples were calculated by Autosorb-iQ analyzer (Quantachrome). Solid state photoluminescence spectra were recorded by Hitachi F-7600 spectrofluorometer, and the fluorescence lifetime was performed under DeltaPro™ fluorescence lifetime system (Horiba JobinYvon IBH Ltd. Scotland). The field-emission scanning electron microscope (Nova Nano SEM 230) equipped with an energy dispersive detector and high-resolution transmission electron microscopy (HR-TEM) were used to record the morphology and lattice structure of sample. Edinburgh fls980 was used to record fluorescence spectra at different temperature.

Gel permeation chromatography (GPC) with refractive index detector (Waters, 2414) was employed to record number average molecular weight ( $M_n$ ) and molecular weight dispersity ( $M_w/M_n$ ) of polymer. PMMA was served as standard to calibrate GPC and use THF as elution at a flow rate of 1.00 mL/min (30 °C).

## Photoelectrochemical measurements

Photoelectrochemical was recorded by CHI 760 electrochemical workstation, using sodium sulfate solution (0.2M) as electrolyte. Platinum plate, saturated Ag/AgCl electrode were served as

counter electrode and reference electrode, and working electrode were combined to construct three-electrode electrochemical cell.

Working electrode: COF (5 mg), Nafio solution (2  $\mu$ L) were added into ethanol (1 mL) to form a mixture solution after sonicating. The solution was dropped onto the surface of FTO glass plate (1  $\times$  1 cm<sup>2</sup>) and dried under room temperature before testing.

Mott-Schottky plots (MS) and electrochemical impedance spectroscopy (EIS) were measured in a three-electrode cell at the frequencies of 500 Hz, 1000 Hz and 2000 Hz. The transient photocurrent response was recorded by switching on/off the light (300 W Xe-lamp,  $\lambda \geq 420$  nm).

## Experiments section

### 1. Preparation of COFs.

TAPT-DMTA-COF: TAPT (28.3 mg, 0.08 mmol) and DMTA (23.3, 0.12 mmol) were mixed in Schlenk tube (10 mL), then 1,4-dioxane (0.2 mL) and mesitylene (0.8 mL) were added into the tube. Acetic acid solution (0.1 mL, 6M) was served as catalyst. After gone through freeze-pump-threw in liquid nitrogen for three times, the tube was sealed under vacuum and put into oven for 3 days at 120  $^{\circ}$ C to afford yellow precipitate. The product was washed with THF and subjected to soxhlet extraction with THF overnight. After dried under vacuum, the final product was obtained as a yellow powder (yield  $\sim$ 83%).

TAPT-DMTA/TP-COF: TAPT (28.3 mg, 0.08 mmol), DMTA (11.7, 0.06 mmol), and 1,4-phthalaldehyde (8.1, 0.06 mmol) were mixed in Schlenk tube (10 mL), then 1,4-dioxane (0.25 mL) and mesitylene (0.75 mL) were added into the tube. Acetic acid solution (0.1 mL, 6M) was served as catalyst. After gone through freeze-pump-threw in liquid nitrogen for three times, the tube was sealed under vacuum and put into oven for 3 days at 120  $^{\circ}$ C to afford yellow precipitate. The product was washed with THF and subjected to soxhlet extraction with THF overnight. After dried under vacuum, the final product was obtained as a yellow powder (yield  $\sim$ 80%).

TAPT-TP-COF: TAPT (28.3 mg, 0.08 mmol) and 1,4-phthalaldehyde (16.1, 0.12 mmol) were mixed in Schlenk tube (10 mL), then 1,4-dioxane (0.5 mL) and *n*-BuOH (0.5 mL) were added into the tube. Acetic acid solution (0.1 mL, 6M) was served as catalyst. After gone through freeze-pump-threw in liquid nitrogen for three times, the tube was sealed under vacuum and put into oven for 3 days at

120 °C to afford yellow precipitate. The product was washed with THF and subjected to soxhlet extraction with THF overnight. After dried under vacuum, the final product was obtained as a yellow powder (yield ~78%).

TAPT-DHTA-COF: TAPT (28.3 mg, 0.08 mmol) and DHTA (19.9, 0.12 mmol) were mixed in Schlenk tube (10 mL), then 1,4-dioxane (0.2 mL) and mesitylene (0.8 mL) were added into the tube. Acetic acid solution (0.1 mL, 6M) was served as catalyst. After gone through freeze-pump-threw in liquid nitrogen for three times, the tube was sealed under vacuum and put into oven for 3 days at 120 °C to afford yellow precipitate. The product was washed with THF and subjected to soxhlet extraction with THF overnight. After dried under vacuum, the final product was obtained as a dark red powder (yield ~88%).

## 2. Electron paramagnetic resonance (EPR) study

Using 2,2,6,6-tetramethylpiperidine (TEMP) as free radical scavenger to detect  $^1\text{O}_2$  generated by COFs in 1 mL mixture solvent ( $\text{CH}_3\text{CN}:\text{H}_2\text{O}=4:1$ ) mixed with 1mg of COF. The EPR experiments were carried out under light irradiation (500 W xenon lamp,  $\lambda > 420$  nm).

5,5-dimethyl-1-pyrroline N-oxide (DMPO) was chosen as scavenger to detect the generation of  $\text{O}_2^{\cdot-}$  radicals in 1 mL methanol mixed with 1mg of COF. The EPR experiments were carried out under light irradiation (500 W xenon lamp,  $\lambda > 420$  nm).

## 3. General methods of polymerization

Typically, COF (10 mg), PEGMA (475 g/mol, 1 mL, 2.3 mmol), CPADB (6.3 mg, 0.023 mmol),  $\text{H}_2\text{O}$  (1 mL) and TEA were added into glass vial (3 mL) under open-to-air condition. The reaction was conducted under magnetic stirring under room temperature by white light irradiation (15 mW,  $\text{cm}^{-2}$ ). A trace amount of mixture was taken with needle at a predetermined time and measured by GPC to obtain the polymeric molecular weight ( $M_n$ ) and molecular weight dispersity ( $M_w/M_n$ ). The monomer conversion was analyzed by  $^1\text{H}$  NMR.

Chain extension polymerization by in-suit synthetic processes: PPEGMA-I was synthesized in aqueous solution with a molar ration of  $[\text{PEGMA}]:[\text{CP-I}]=100:1$  under aqueous condition ( $\text{H}_2\text{O}=1\text{mL}$ , PEGMA=1mL, TAPT-DMTA/TP-COF=10mg). When the monomer conversion exceeds 90%, the

second monomers HPMA (1 mL) was added for further polymerization. The sample was taken at predetermined time and characterized by GPC to give the value of  $M_n$  and  $M_w/M_n$  of product.

Cycling experiments: COF (10 mg), PEGMA (475 g/mol, 1 mL, 2.3 mmol), CPADB (6.3 mg, 0.023 mmol), H<sub>2</sub>O (1 mL) and TEA (32  $\mu$ L, 0.23 mmol, 10 eq.) were added into glass vial (3 mL) under open-to-air condition. After reaction, the solid and liquid phases were separated by centrifugation, and a trace amount of polymer was collected and then analyzed by <sup>1</sup>H NMR and GPC to obtain the monomer conversion. The COF was recovered and washed with THF, and reused after dried.

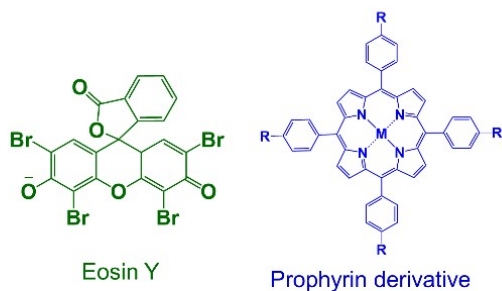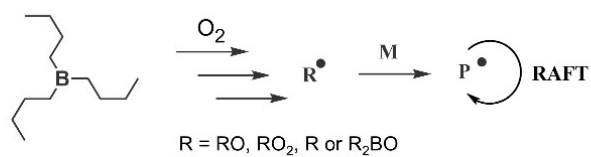

(b) Alkylborane catalyze RAFT polymerization by reacting with oxygen to form initiator

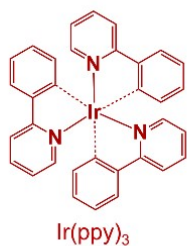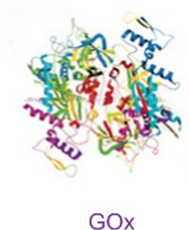

(a) Photocatalysts for RAFT polymerization by converting oxygen into inactive species

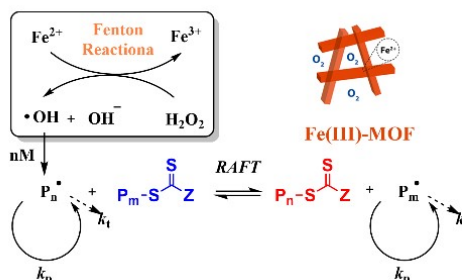

(c) Fenton reaction mediated RAFT polymerization by using H<sub>2</sub>O<sub>2</sub> as co-initiator under open-to-air condition

**Scheme S1.** Several structures of previous reports photocatalysts for mediating RAFT polymerization under aerobic condition.<sup>[1]</sup> (a) Oxygen consuming photocatalysts, (b) oxygen-mediated photocatalyst and (c) Fenton-reaction for initiating RAFT polymerization using H<sub>2</sub>O<sub>2</sub> as co-initiator under open-to-air condition.

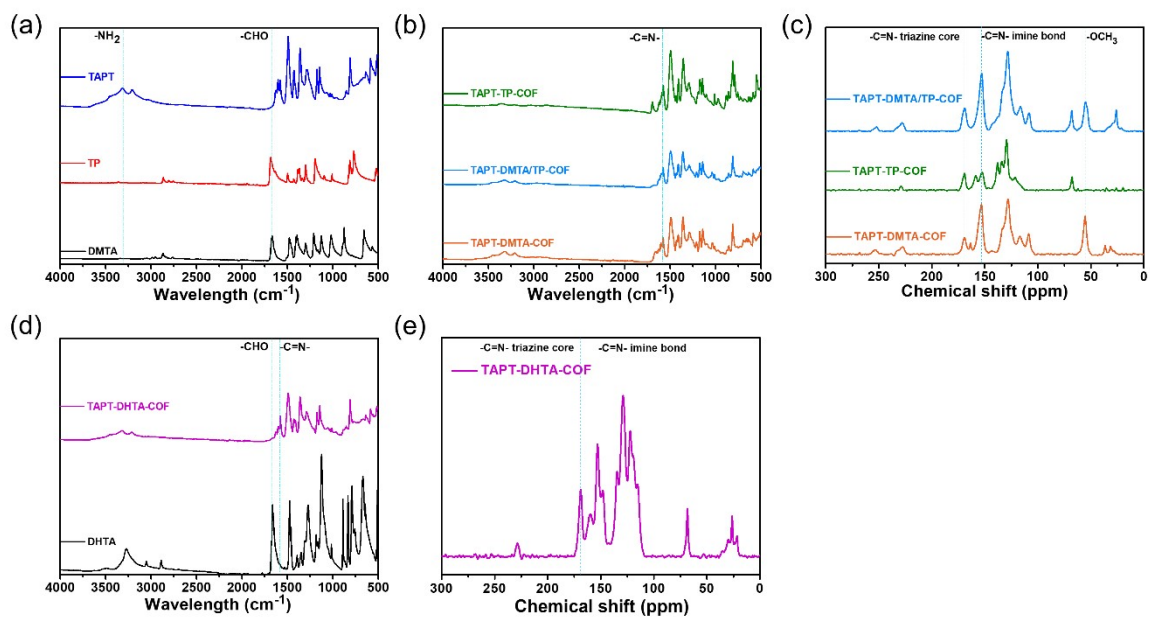

**Figure S1.** FT-IR spectra of monomers and COFs (a, b, d) and  $^{13}\text{C}$  NMR spectra of synthetic COFs (c, e).

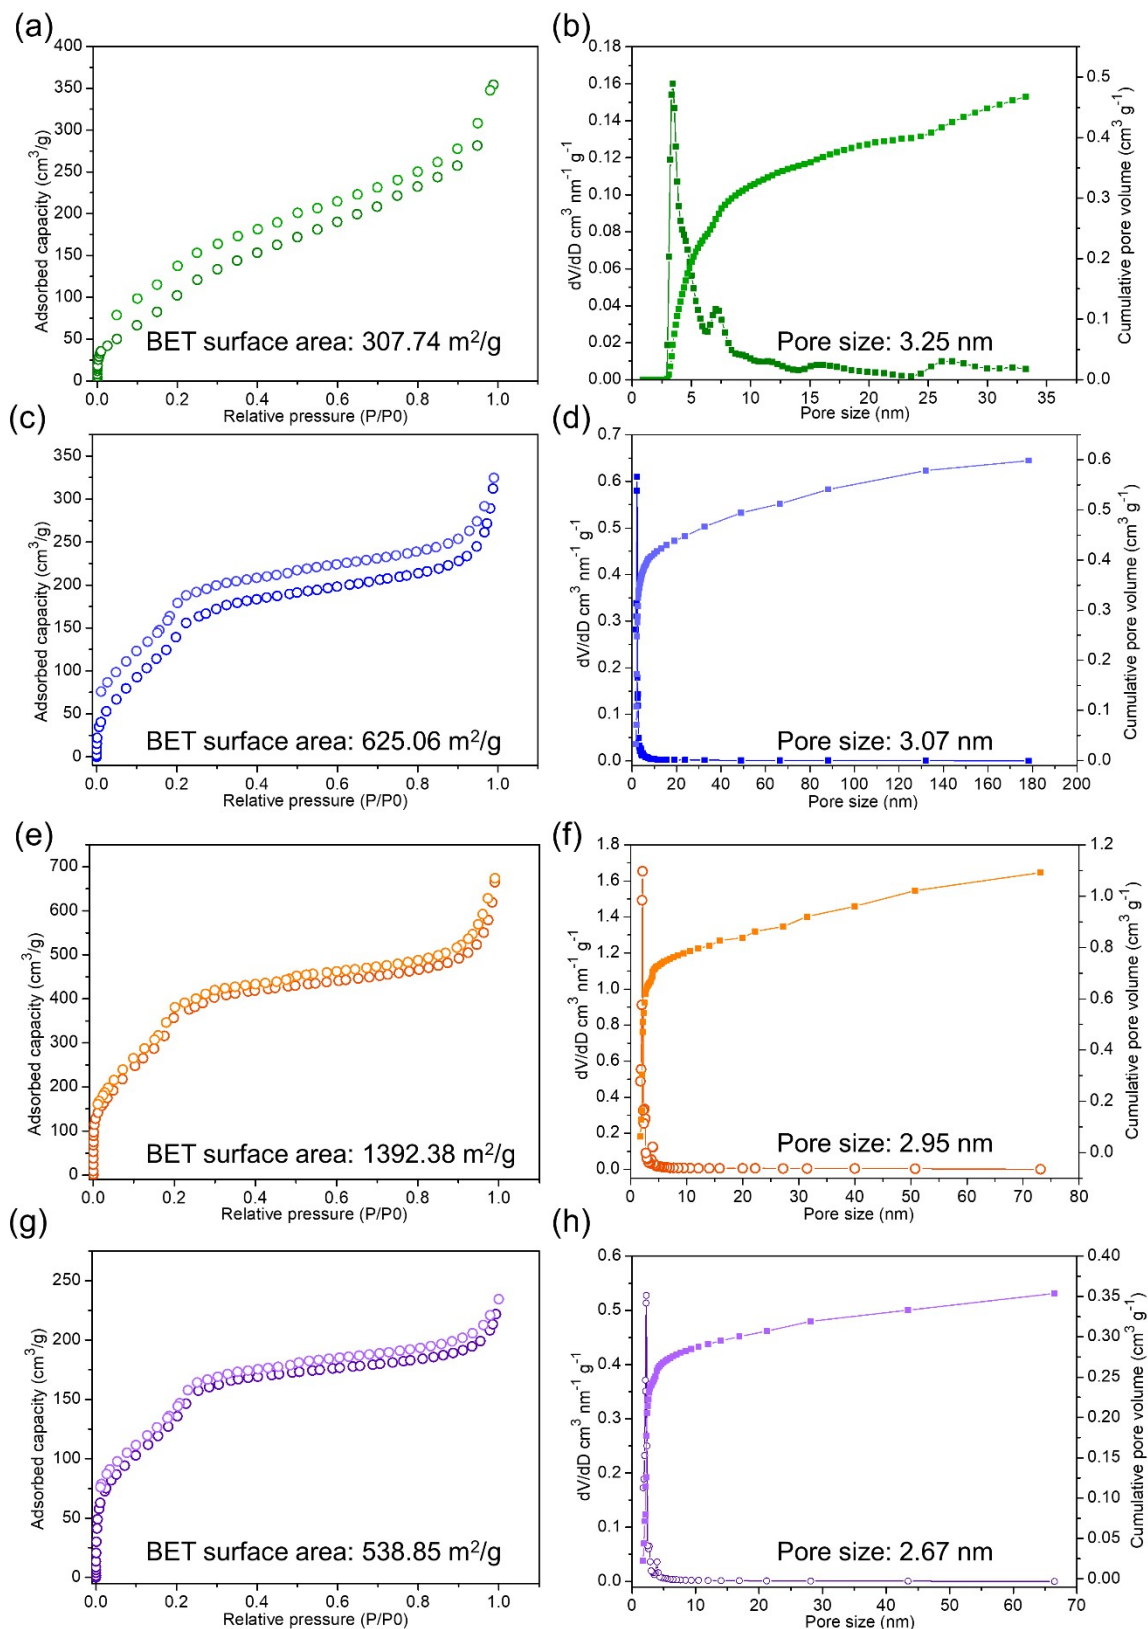

**Figure S2.** The nitrogen adsorption-desorption isotherm and pore distribution and pore volume of (a, b) TAPT-TP-COF, (c, d) TAPT-DMTA/TP-COF, (e, f) TAPT-DMTA-COF and (g, h) TAPT-DHTA-COF.



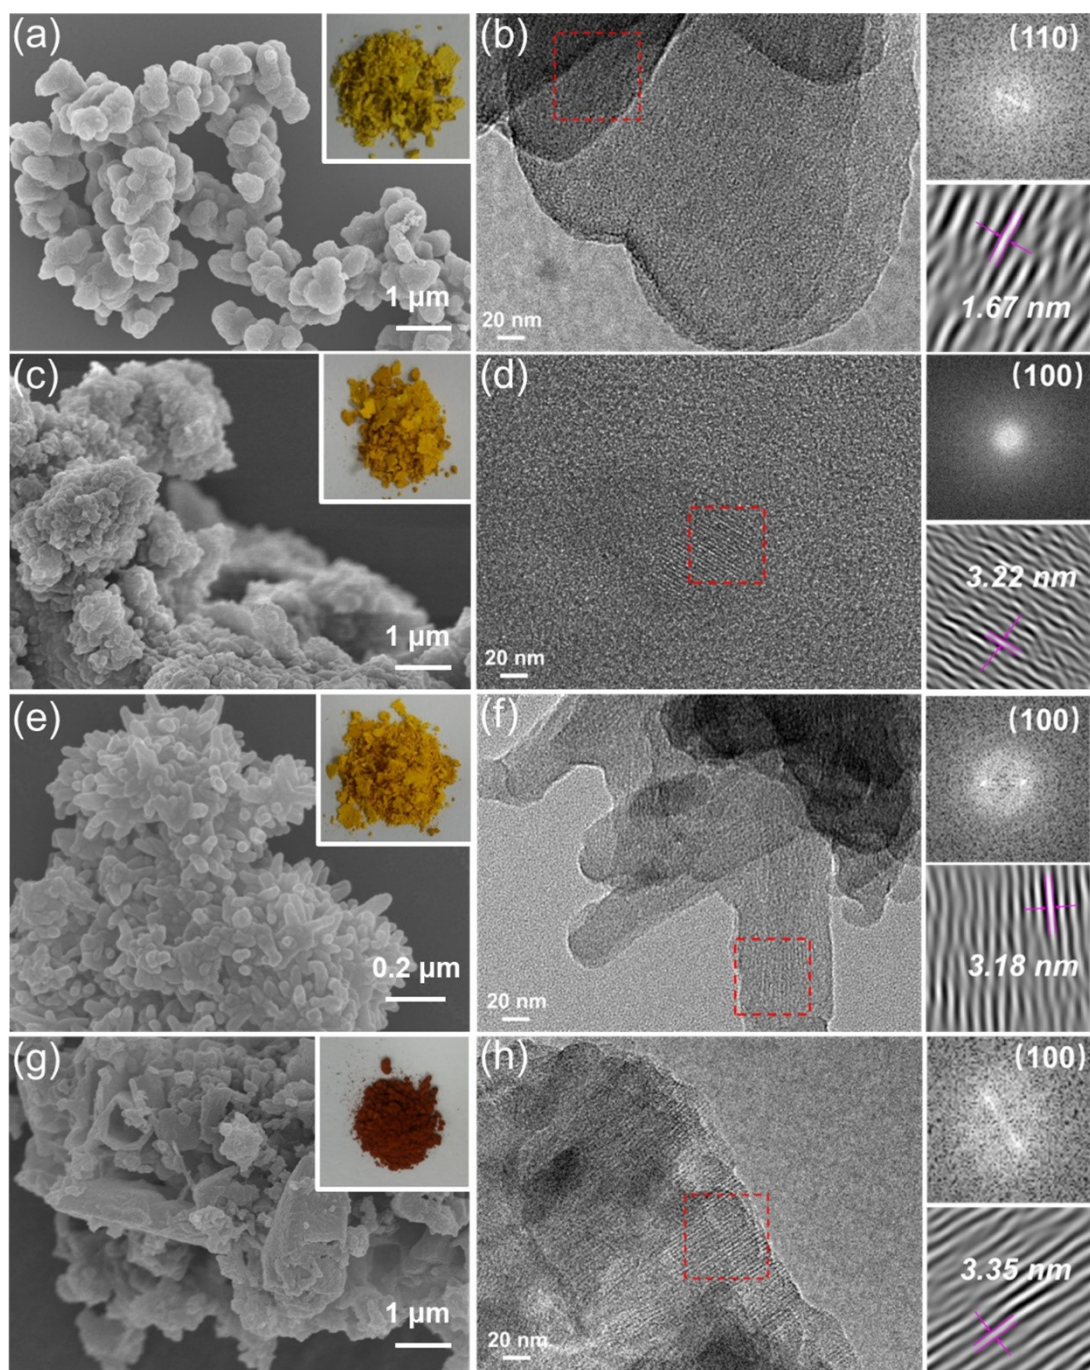

**Figure S3.** SEM and TEM images of (a, b) TAPT-TP-COF, (c, d) TAPT-DMTA/TP-COF, (e, f) TAPT-DMTA-COF and (g, h) TAPT-DHTA-COF.

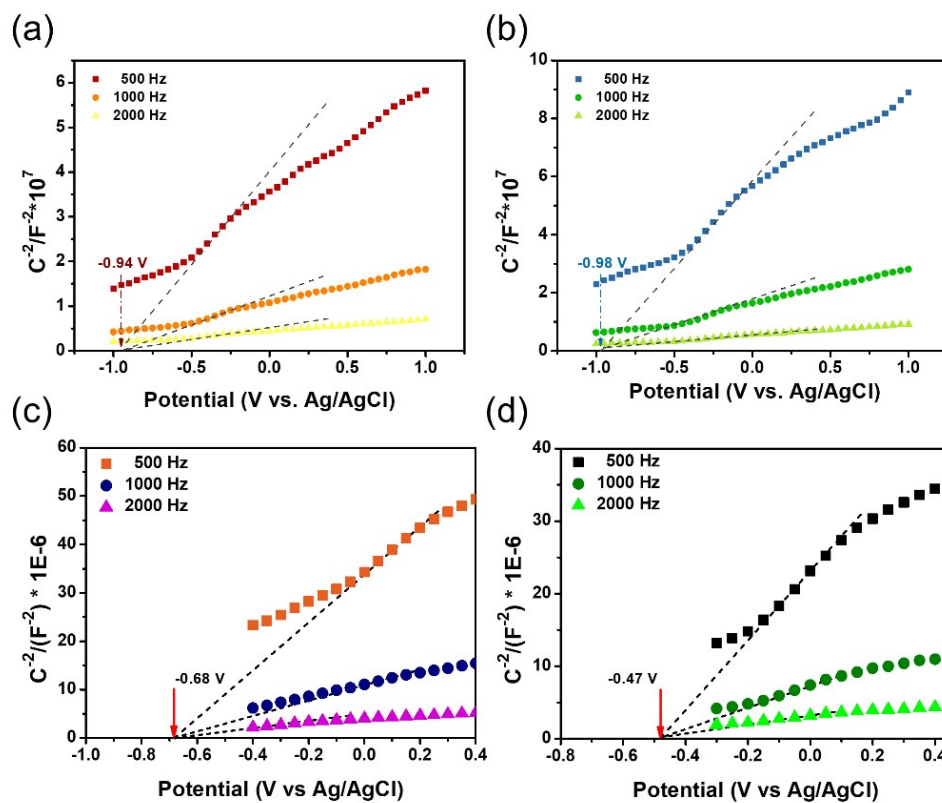

**Figure S4.** Mott-Schottky plots of (a) TAPT-DMTA-COF, (b) TAPT-DMTA/TP-COF, (c) TAPT-TP-COF and (d) TAPT-DHTA-COF.

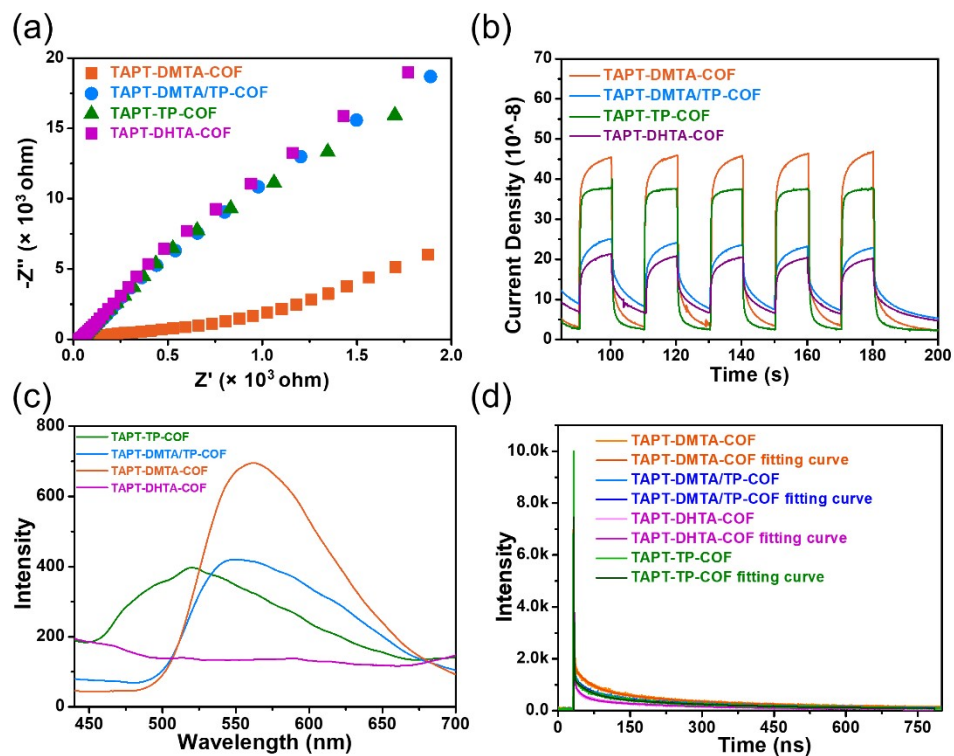

| #                | $\tau_1$ (ns) | $\tau_2$ (ns) | $\tau_3$ (ns) | Average lifetime (ns) |
|------------------|---------------|---------------|---------------|-----------------------|
| TAPT-DMTA-COF    | 35.03         | 259.56        | 0.77          | 23.08                 |
| TAPT-DMTA/TP-COF | 30.01         | 232.35        | 0.66          | 14.10                 |
| TAPT-DHTA-COF    | 17.58         | 201.11        | 0.90          | 9.66                  |
| TAPT-TP-COF      | 30.91         | 239.14        | 0.81          | 16.17                 |

**Figure S5.** (a) Nyquist plots and (b) photocurrent response of COFs. (c) Photoluminescence spectra of materials with the excitation wavelength of 365 nm and (d) time-resolved photoluminescence spectra of COFs.

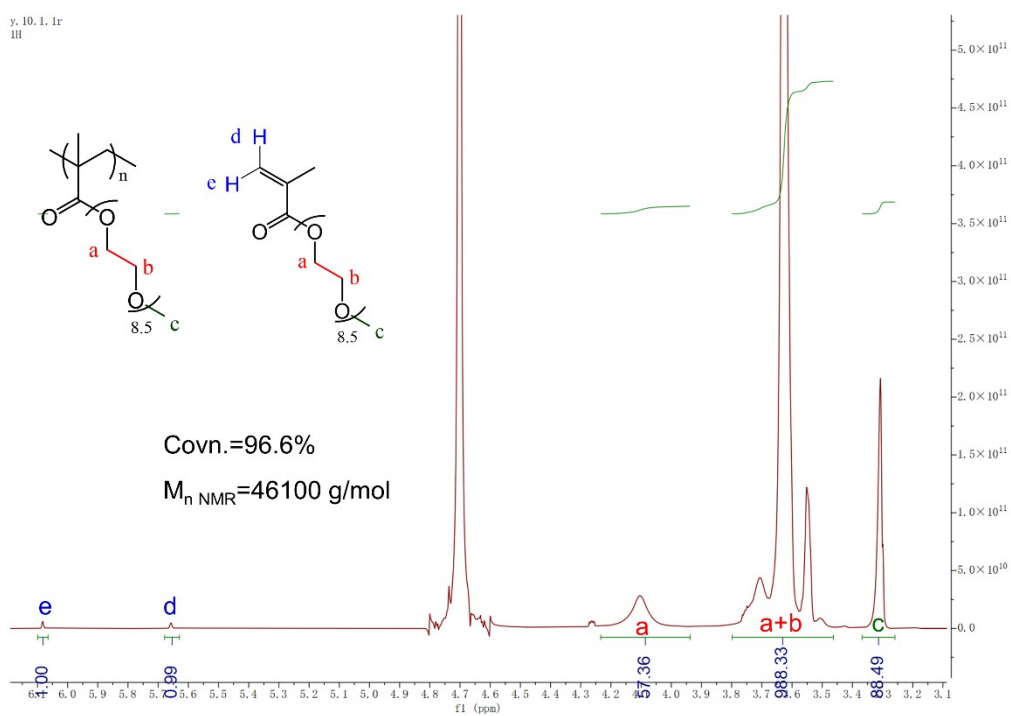

**Figure S6.**  $^1\text{H}$  NMR spectrum of obtained crude product in  $\text{D}_2\text{O}$  for calculating monomer conversion by using TAPT-DMTA/TP-COF as photocatalyst ( $[\text{PEGMA}]:[\text{CPADB}]=100:1$  in aqueous system under open-to-air condition).

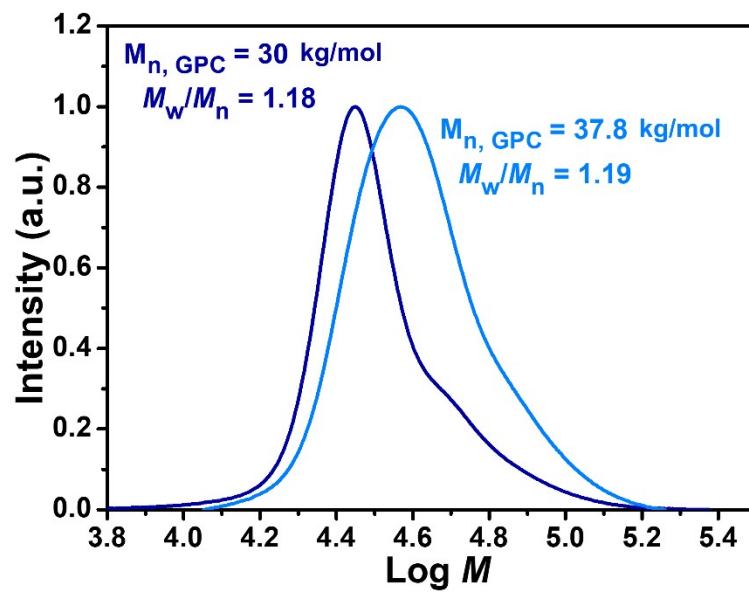

**Figure S7.** Chain-extension reaction by using PPEGMA<sub>475</sub> as macroinitiator, HPMA as monomers and TAPT-DMTA/TP-COF as photocatalyst.

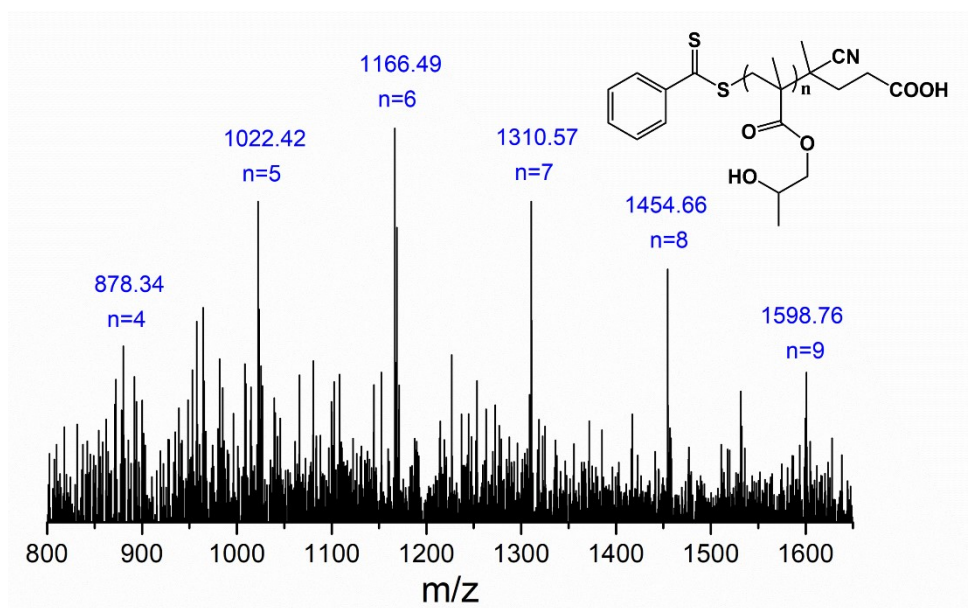

**Figure S8.** LC-QTOF-MS spectrometry with HPMA (using TAPT-DMTA-COF as photocatalyst, DP = 30, [CPADB] : [TEA] = 100 : 10).



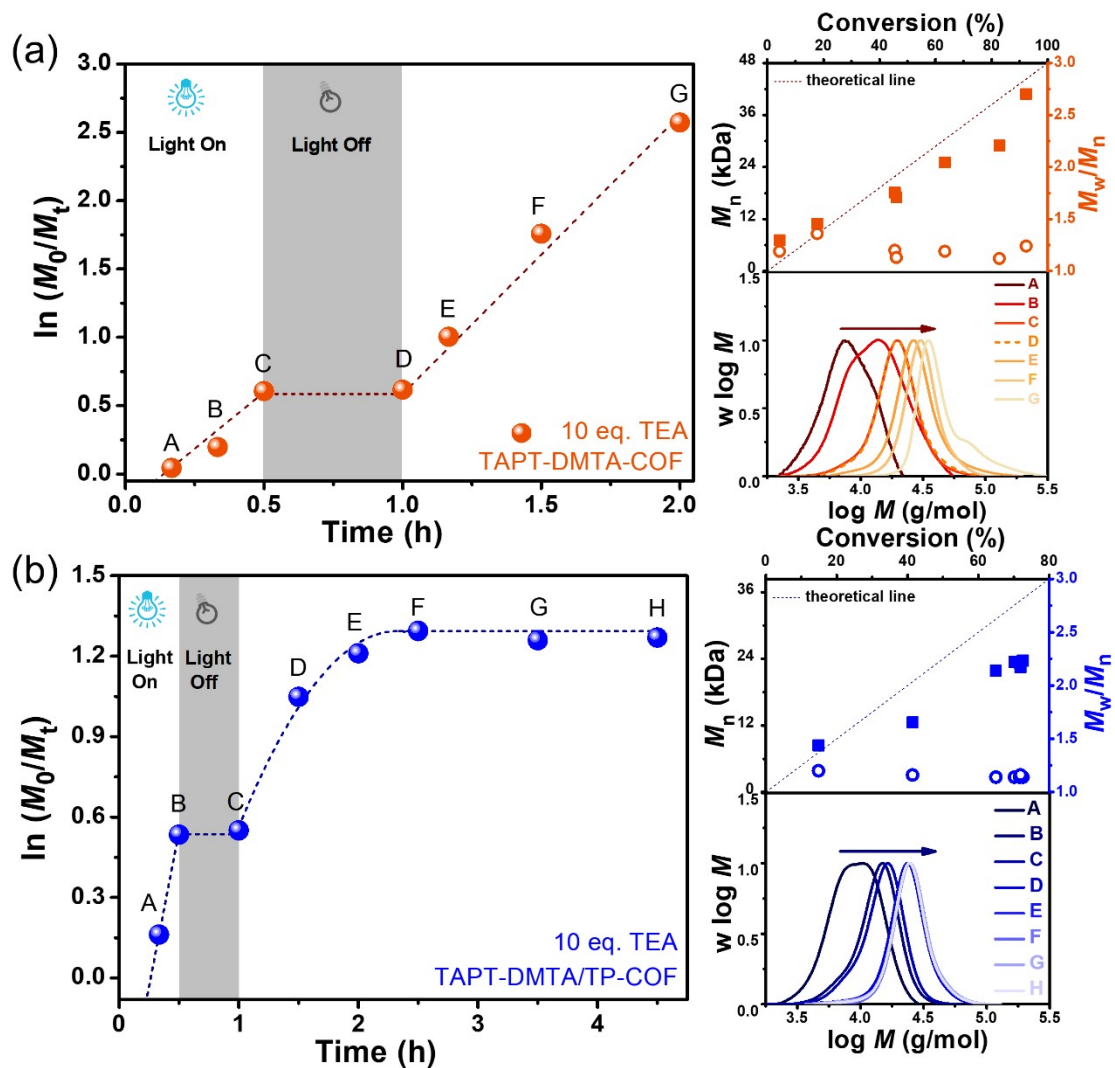

**Figure S9.** (a) Kinetic plots and temporal control in RAFT polymerization by using (a) TAPT-DMTA-COF and (b) TAPT-DMTA/TP-COF as photocatalysts with the molar ratio of [PEGMA<sub>475</sub>]:[CPADB]:[TEA]=100:1:10 in aqueous solution.

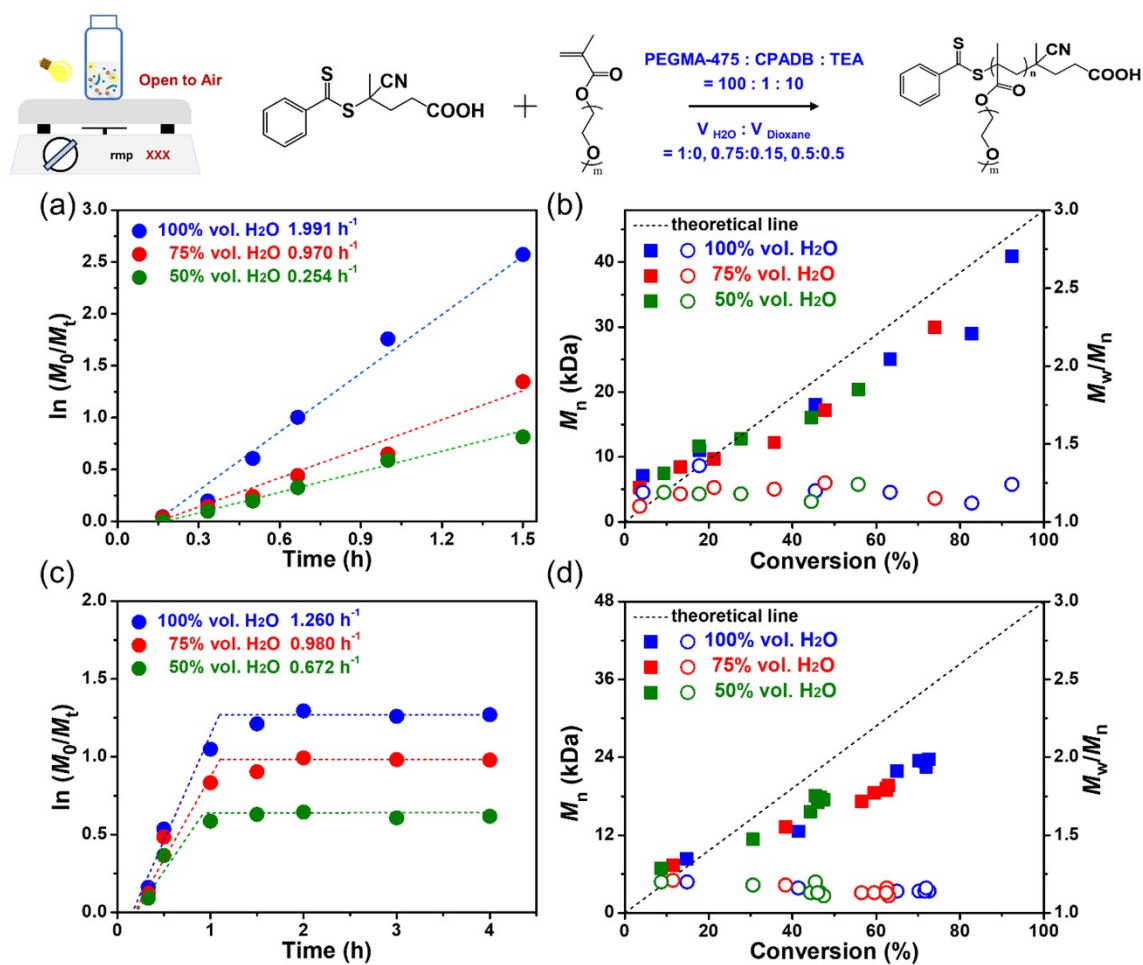

**Figure S10.** Kinetic plots and  $M_n$  vs conversion at different volume of H<sub>2</sub>O and dioxane by using (a, b) TAPT-DMTA-COF and (c, d) TAPT-DMTA/TP-COF as photocatalysts under white light irradiation, using molar ratio of [PEGMA] : [CPADB] : [TEA] = 100 : 1 : 10.



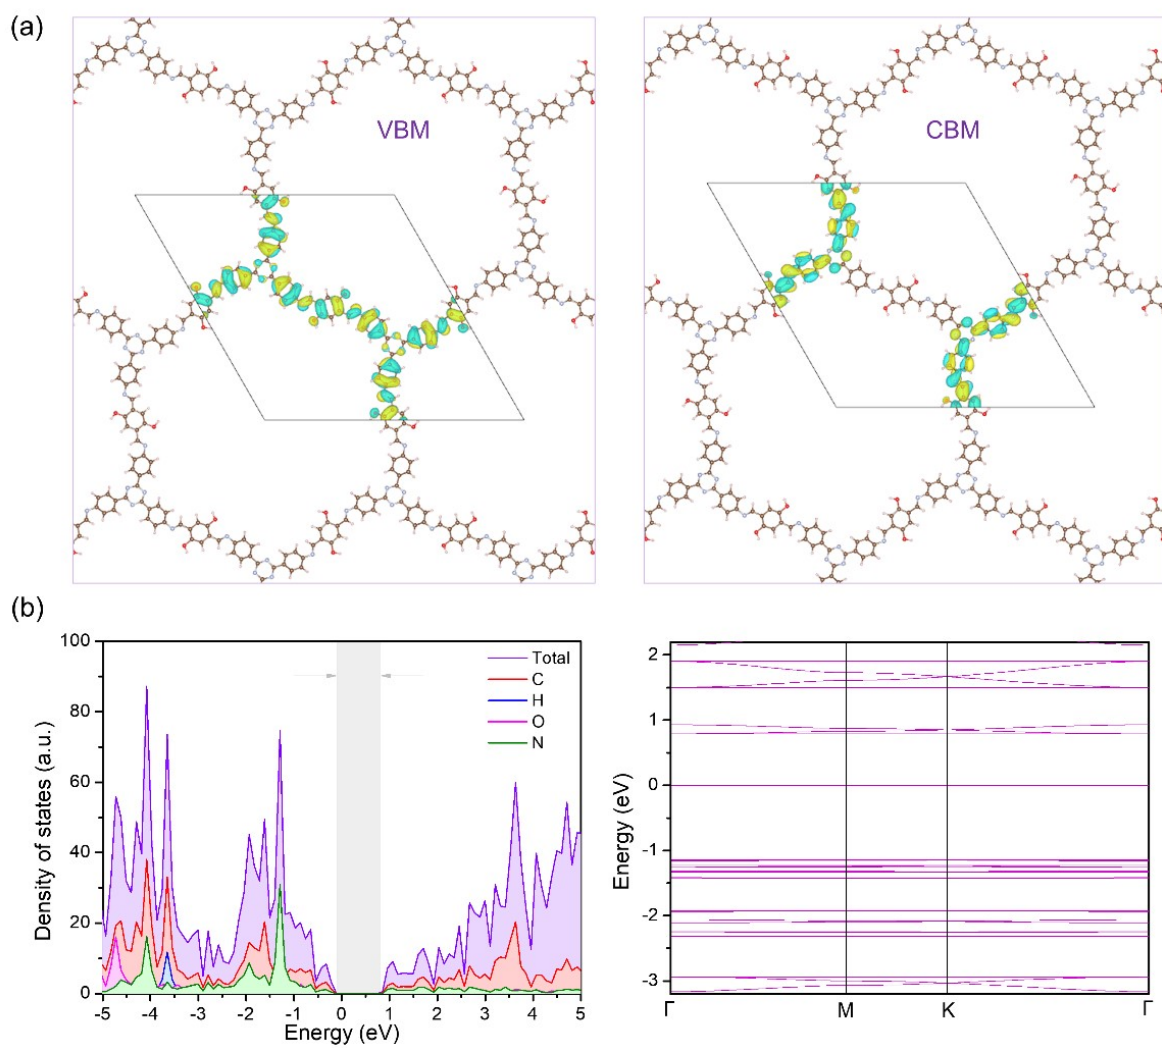

**Figure S11.** The charges spatial distribution of (a) VBM and CBM, (b) electron density of states and energy band gap structure of TAPT-DHTA-COF.

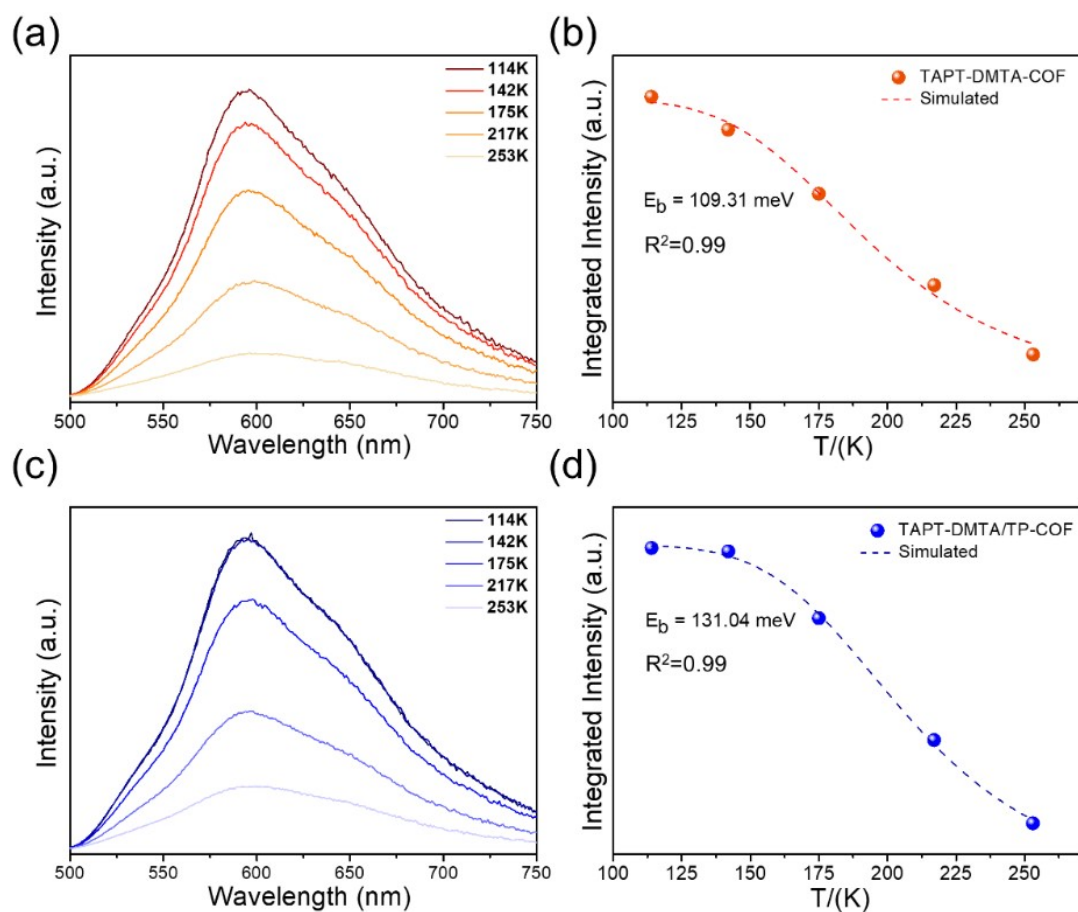

**Figure S12.** Temperature-dependent of photoluminescence spectra with excitation wavelength at 360 nm and exciton binding energy of (a, b) TAPT-DMTA-COF and (c, d) TAPT-DMTA/TP-COF.

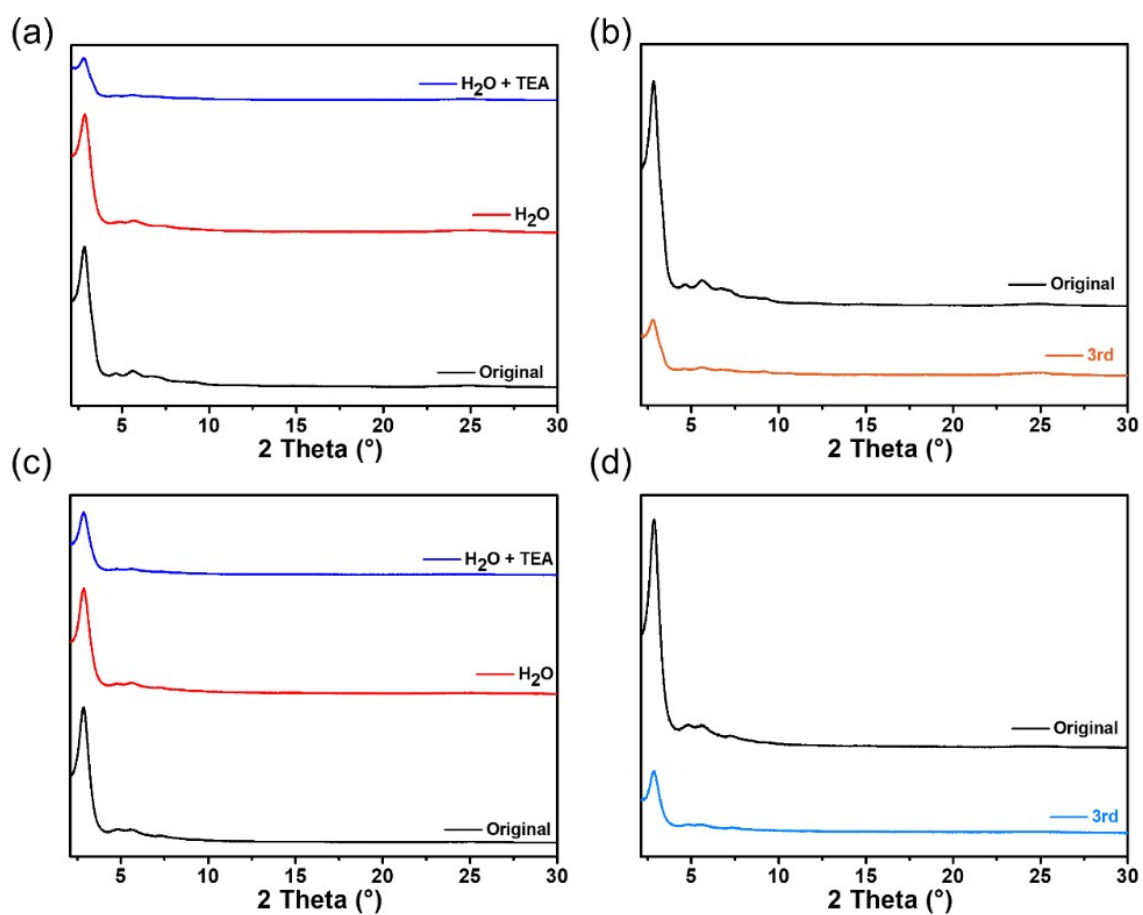

**Figure S13.** PXRD data of COFs immersed in water for overnight and after catalyzed (a, b) TAPT-DMTA-COF, (c, d) TAPT-DMTA/TP-COF.

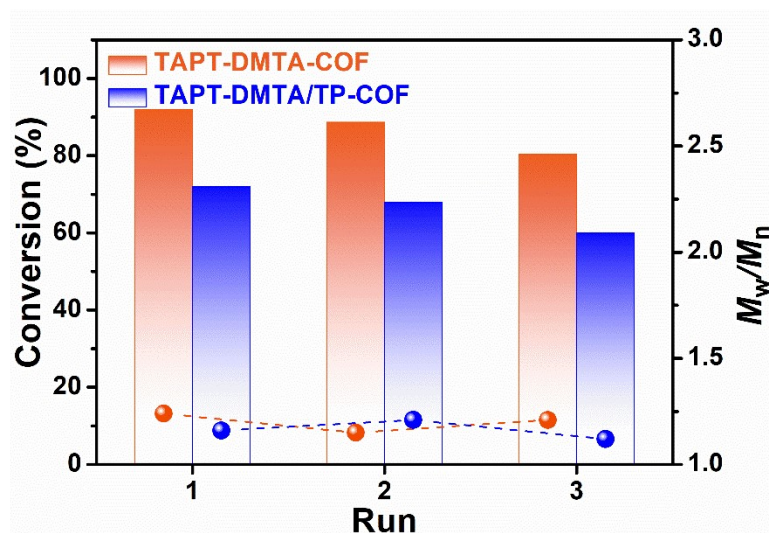

**Figure S14.** Polymerization results of COFs recycled experiments. Polymerization condition: COF (10 mg), [PEGMA<sub>475</sub>]:[CPADB]:[TEA]=100:1:10, H<sub>2</sub>O=1mL under white light irradiation.

Polymerization setup was shown as below

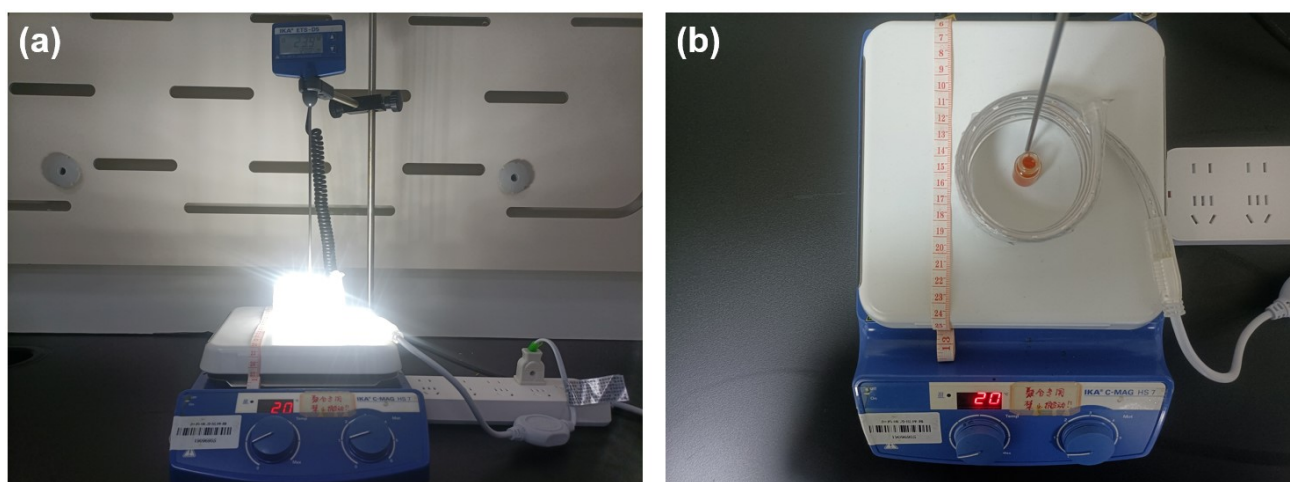

**Figure S15.** Photo of the polymerization setup ( $V_{\text{vessel}}=3$  mL).

Table S1. Controlled experiments for COF-mediated RAFT polymerization<sup>a</sup>

| #               | [M]:[CPADB]<br>:[TEA] | COF               | T<br>(h) | $M_{n,GPC}^b$<br>(kDa) | $M_{n,th}^c$<br>(kDa) | $\alpha^d$<br>(%) | $M_w/M_n^b$ |
|-----------------|-----------------------|-------------------|----------|------------------------|-----------------------|-------------------|-------------|
| 1               | 100:1:0               | -                 | 15       | -                      | -                     | -                 | -           |
| 2               | 100:1:10              | -                 | 15       | -                      | -                     | -                 | -           |
| 3               | 100:1:0               | TAPT-DMTA-COF     | 8        | 26.1                   | 40.1                  | 75.1              | 1.14        |
| 4               | 100:1:10              | TAPT-DMTA-COF     | 1.5      | 40.9                   | 44.2                  | 92.4              | 1.24        |
| 5 <sup>e</sup>  | 100:1:0               | TAPT-DMTA-COF     | 8        | -                      | -                     | -                 | -           |
| 6               | 100:1:0               | TAPT-DMTA/TP-COF  | 10       | 35.3                   | 41.9                  | 87.7              | 1.19        |
| 7               | 100:1:10              | TAPT-DMTA/TP -COF | 4        | 22.5                   | 34.4                  | 71.9              | 1.16        |
| 8 <sup>e</sup>  | 100:1:0               | TAPT-DMTA/TP -COF | 10       | -                      | -                     | -                 | -           |
| 9               | 100:1:10              | TAPT-TP-COF       | 15       | -                      | -                     | -                 | -           |
| 10 <sup>e</sup> | 100:1:10              | TAPT-TP-COF       | 15       | -                      | -                     | -                 | -           |
| 11              | 100:1:10              | TAPT-DHTA-COF     | 15       | -                      | -                     | -                 | -           |
| 12 <sup>e</sup> | 100:1:10              | TAPT-DHTA-COF     | 15       | -                      | -                     | -                 | -           |

a) The polymerization was conducted under white light irradiation ( $15 \text{ mW cm}^{-2}$ ); b)  $M_{n,GPC}$  and  $M_w/M_n$  were calculated by GPC analysis using PMMA as standard; c)  $M_{n,th} = M_w(\text{initiator}) + M_w(\text{monomer}) \times \alpha \times ([\text{monomer}]/[\text{initiator}])$ ; d) monomer conversion  $\alpha$  was detected by  $^1\text{H NMR}$ ; e) polymerization in the dark.

Table S2. Results of RAFT polymerization of PEGMA<sub>475</sub> using COF (10 mg) as photocatalyst under air condition<sup>a</sup>

| # | [M]:[CPADB]<br>:[TEA] | Solvent                                 | COFs              | T<br>(h) | $M_{n, GPC}^b$<br>(kDa) | $M_{n, th}^c$<br>(kDa) | $\alpha^d$<br>(%) | $M_w/M_n^b$ |
|---|-----------------------|-----------------------------------------|-------------------|----------|-------------------------|------------------------|-------------------|-------------|
| 1 | 100:1:10              | DMAc                                    | TAPT-DMTA-COF     | 16       | -                       | -                      | -                 | -           |
| 2 | 100:1:10              | EtOH                                    | TAPT-DMTA-COF     | 16       | -                       | -                      | -                 | -           |
| 3 | 100:1:10              | MeCN                                    | TAPT-DMTA-COF     | 16       | -                       | -                      | -                 | -           |
| 4 | 100:1:10              | Dioxane                                 | TAPT-DMTA-COF     | 16       | -                       | -                      | -                 | -           |
| 5 | 100:1:10              | H <sub>2</sub> O/Dioxane<br>(v/v=75/25) | TAPT-DMTA-COF     | 1.5      | 29.9                    | 35.4                   | 74.0              | 1.15        |
| 6 | 100:1:10              | H <sub>2</sub> O/Dioxane<br>(v/v=50/50) | TAPT-DMTA-COF     | 1.5      | 20.4                    | 26.7                   | 55.7              | 1.24        |
| 4 | 100:1:10              | DMAc                                    | TAPT- DMTA/TP-COF | 20       | -                       | -                      | -                 | -           |
| 5 | 100:1:10              | EtOH                                    | TAPT- DMTA/TP-COF | 20       | -                       | -                      | -                 | -           |
| 6 | 100:1:10              | MeCN                                    | TAPT- DMTA/TP-COF | 20       | -                       | -                      | -                 | -           |
| 7 | 100:1:10              | Dioxane                                 | TAPT- DMTA/TP-COF | 20       | -                       | -                      | -                 | -           |
| 8 | 100:1:10              | H <sub>2</sub> O/Dioxane<br>(v/v=75/25) | TAPT- DMTA/TP-COF | 4        | 19.2                    | 29.9                   | 62.4              | 1.13        |
| 9 | 100:1:10              | H <sub>2</sub> O/Dioxane<br>(v/v=50/50) | TAPT- DMTA/TP-COF | 4        | 17.0                    | 22.2                   | 46.1              | 1.13        |

a) The polymerization was conducted under white light irradiation (15 mW cm<sup>-2</sup>); b)  $M_{n, GPC}$  and  $M_w/M_n$  were calculated by GPC analysis using PMMA as standard; c)  $M_{n, th} = M_w$  (initiator)+ $M_w$  (monomer) $\times\alpha\times([monomer]/[initiator])$ ; d) monomer conversion  $\alpha$  was detected by <sup>1</sup>H NMR.

Table S3. Radical scavenging RAFT polymerization experiments using TAPT-DMTA-COF (#1-8) and TAPT-DMTA/TP-COF (#9-14) as a photocatalyst under air condition<sup>a</sup>

| #  | Quencher | Role                                   | [PEGMA <sub>475</sub> ]:[CPADB]:<br>[TEA]:[Quencher] | T<br>(h) | $M_{n,GPC}^b$<br>(kDa) | $\alpha^c$<br>(%) | $M_w/M_n^b$ |
|----|----------|----------------------------------------|------------------------------------------------------|----------|------------------------|-------------------|-------------|
| 1  | BQ       | O <sub>2</sub> <sup>•-</sup> scavenger | 100:1:10:0.5                                         | 1.5      | -                      | -                 | -           |
| 2  | MB       | OH <sup>•</sup> scavenger              | 100:1:10:0.5                                         | 1.5      | -                      | -                 | -           |
| 3  | BQ       | O <sub>2</sub> <sup>•-</sup> scavenger | 100:1:10:0.05                                        | 1.5      | 11.2                   | 28.2              | 1.17        |
| 4  | MB       | OH <sup>•</sup> scavenger              | 100:1:10:0.05                                        | 1.5      | 20.4                   | 55.8              | 1.36        |
| 5  | BQ       | O <sub>2</sub> <sup>•-</sup> scavenger | 100:1:10:0.01                                        | 1.5      | 29.0                   | 82.8              | 1.12        |
| 6  | MB       | OH <sup>•</sup> scavenger              | 100:1:10:0.01                                        | 1.5      | 37.5                   | 86.5              | 1.52        |
| 7  | BQ       | O <sub>2</sub> <sup>•-</sup> scavenger | 100:1:0:0.01                                         | 8        | 15.8                   | 50.2              | 1.21        |
| 8  | MB       | OH <sup>•</sup> scavenger              | 100:1:0:0.01                                         | 8        | 6.3                    | 3.3               | 1.16        |
| 9  | BQ       | O <sub>2</sub> <sup>•-</sup> scavenger | 100:1:10:0.5                                         | 8        | -                      | -                 | -           |
| 10 | MB       | OH <sup>•</sup> scavenger              | 100:1:10:0.5                                         | 8        | -                      | -                 | -           |
| 11 | BQ       | O <sub>2</sub> <sup>•-</sup> scavenger | 100:1:10:0.05                                        | 8        | 6.8                    | 9.1               | 1.14        |
| 12 | MB       | OH <sup>•</sup> scavenger              | 100:1:10:0.05                                        | 8        | 6.5                    | 16.9              | 1.16        |
| 13 | BQ       | O <sub>2</sub> <sup>•-</sup> scavenger | 100:1:0:0.05                                         | 8        | -                      | -                 | -           |
| 14 | MB       | OH <sup>•</sup> scavenger              | 100:1:0:0.05                                         | 8        | -                      | -                 | -           |

a) The polymerization was conducted under white light irradiation (15 mW cm<sup>-2</sup>), BQ=1,4-benzoquinone, MB= methylene blue; b)  $M_{n,GPC}$  and  $M_w/M_n$  were calculated by GPC analysis using PMMA as standard; c) monomer conversion  $\alpha$  was detected by <sup>1</sup>H NMR.



## DFT calculations

COFs periodic density functional theory (DFT) simulations were performed to obtain electronic properties using the Vienna Ab initio Simulation Package (VASP)<sup>[2]</sup>.

Table S4. Atomic coordinates of COFs

| Eclipsed mode --- TAPT-TP-COF |              |             |             |
|-------------------------------|--------------|-------------|-------------|
| Atom                          | x            | y           | z           |
| C1                            | 0.967115402  | 19.77421761 | 2.094314098 |
| C2                            | 2.050683975  | 18.80335045 | 1.949317455 |
| C3                            | 3.256928444  | 19.26242065 | 1.392290235 |
| C4                            | 4.30710125   | 18.38175583 | 1.218297005 |
| C5                            | 4.181774139  | 17.04196167 | 1.649602771 |
| C6                            | 2.947608948  | 16.56392288 | 2.129673958 |
| C7                            | 1.88222599   | 17.44551468 | 2.279963255 |
| C8                            | 6.418521881  | 16.7667675  | 1.913576365 |
| C9                            | 7.698339462  | 16.09670067 | 1.892210126 |
| C10                           | 8.860954285  | 16.89859963 | 1.905111313 |
| C11                           | 10.11312008  | 16.30692291 | 1.875748158 |
| C12                           | 0.287737846  | 21.94774628 | 2.094314098 |
| C13                           | 0.586766243  | 23.37154388 | 1.949317455 |
| C14                           | -0.413921356 | 24.18664742 | 1.392290235 |
| C15                           | -0.17633152  | 25.53645515 | 1.218297005 |
| C16                           | 1.046611786  | 26.09784699 | 1.649602771 |
| C17                           | 2.077707291  | 25.26801872 | 2.129673958 |
| C18                           | 1.846934319  | 23.90454102 | 2.279963255 |
| C19                           | 0.1665802    | 28.17249489 | 1.913576365 |
| C20                           | 0.106967926  | 29.61588287 | 1.892210126 |
| C21                           | -1.168804169 | 30.2217865  | 1.905111313 |
| C22                           | 16.61380386  | 0.604756832 | 1.875748158 |
| C23                           | -1.254903793 | 20.27262116 | 2.094314098 |
| C24                           | -2.637446404 | 19.81965828 | 1.949317455 |
| C25                           | -2.84300375  | 18.54548454 | 1.392290235 |
| C26                           | -4.130766392 | 18.07634163 | 1.218297005 |
| C27                           | -5.228435516 | 18.85477638 | 1.649602771 |
| C28                           | -5.025312901 | 20.16261292 | 2.129673958 |
| C29                           | -3.729102135 | 20.64446449 | 2.279963255 |
| C30                           | -6.585098267 | 17.05529022 | 1.913576365 |
| C31                           | -7.80530405  | 16.28197098 | 1.892210126 |
| C32                           | -7.692145824 | 14.87416649 | 1.905111313 |

|     |              |             |             |
|-----|--------------|-------------|-------------|
| C33 | 26.96194077  | 14.08559704 | 1.875748158 |
| C34 | 16.92917252  | 11.22305965 | 2.094314098 |
| C35 | 15.8456068   | 12.1939249  | 1.949317455 |
| C36 | 14.63936234  | 11.73485565 | 1.392290235 |
| C37 | 13.58919144  | 12.61551952 | 1.218297005 |
| C38 | 13.71451664  | 13.95531464 | 1.649602771 |
| C39 | 14.94868088  | 14.43335533 | 2.129673958 |
| C40 | 16.01406479  | 13.55176067 | 2.279963255 |
| C41 | 11.47776794  | 14.2305088  | 1.913576365 |
| C42 | 10.19795036  | 14.90057659 | 1.892210126 |
| C43 | 9.035335541  | 14.09867764 | 1.905111313 |
| C44 | 7.783168793  | 14.69035339 | 1.875748158 |
| C45 | 17.60855293  | 9.049530983 | 2.094314098 |
| C46 | 17.30952072  | 7.625732899 | 1.949317455 |
| C47 | 18.31021309  | 6.810628414 | 1.392290235 |
| C48 | 18.07261848  | 5.460821152 | 1.218297005 |
| C49 | 16.84967804  | 4.899429321 | 1.649602771 |
| C50 | 15.81858254  | 5.729257584 | 2.129673958 |
| C51 | 16.04935646  | 7.092734814 | 2.279963255 |
| C52 | 17.72971153  | 2.824781895 | 1.913576365 |
| C53 | 17.7893219   | 1.381393552 | 1.892210126 |
| C54 | 19.06509399  | 0.775489807 | 1.905111313 |
| C55 | 1.282485962  | 30.39252091 | 1.875748158 |
| C56 | 19.15119553  | 10.7246542  | 2.094314098 |
| C57 | 20.53373718  | 11.17761803 | 1.949317455 |
| C58 | 20.73929215  | 12.45179176 | 1.392290235 |
| C59 | 22.02705574  | 12.92093563 | 1.218297005 |
| C60 | 23.12472343  | 12.14250183 | 1.649602771 |
| C61 | 22.92160225  | 10.83466435 | 2.129673958 |
| C62 | 21.62539291  | 10.35281086 | 2.279963255 |
| C63 | 24.48138619  | 13.94198608 | 1.913576365 |
| C64 | 25.7015934   | 14.71530628 | 1.892210126 |
| C65 | 25.58843613  | 16.12310982 | 1.905111313 |
| C66 | -9.065649986 | 16.91168022 | 1.875748158 |
| N1  | 1.327727318  | 21.08533859 | 2.11009717  |
| N2  | 5.293525696  | 16.17837906 | 1.642393589 |
| N3  | -1.028014183 | 21.60445023 | 2.11009717  |
| N4  | 1.238639832  | 27.49241447 | 1.642393589 |
| N5  | -0.299708366 | 19.30476379 | 2.11009717  |
| N6  | -6.532161713 | 18.32376099 | 1.642393589 |
| N7  | 16.56856346  | 9.911937714 | 2.11009717  |
| N8  | 12.60276318  | 14.81889916 | 1.642393589 |
| N9  | 18.92430496  | 9.39282608  | 2.11009717  |

|     |              |             |             |
|-----|--------------|-------------|-------------|
| N10 | 16.6576519   | 3.50486207  | 1.642393589 |
| N11 | 18.19599533  | 11.69251347 | 2.11009717  |
| N12 | 24.42844963  | 12.67351627 | 1.642393589 |
| H1  | 8.75531292   | 17.99295807 | 1.930357814 |
| H2  | 3.328818321  | 20.30823708 | 1.080353379 |
| H3  | 5.229905128  | 18.71435738 | 0.730287015 |
| H4  | 2.871353149  | 15.51252461 | 2.434840918 |
| H5  | 0.922340393  | 17.10876083 | 2.682936668 |
| H6  | 6.451219559  | 17.84742546 | 2.185630322 |
| H7  | -2.063727379 | 29.58311844 | 1.930357814 |
| H8  | -1.355570793 | 23.72599602 | 1.080353379 |
| H9  | -0.925756454 | 26.16929627 | 0.730287015 |
| H10 | 3.026371002  | 25.7276783  | 2.434840918 |
| H11 | 2.618515968  | 23.24163246 | 2.682936668 |
| H12 | -0.785627365 | 27.66044998 | 2.185630322 |
| H13 | -6.69158268  | 14.41847611 | 1.930357814 |
| H14 | -1.973243713 | 17.96031761 | 1.080353379 |
| H15 | -4.304092884 | 17.11086845 | 0.730287015 |
| H16 | -5.897720337 | 20.75435066 | 2.434840918 |
| H17 | -3.540797234 | 21.64412689 | 2.682936668 |
| H18 | -5.665534019 | 16.48664475 | 2.185630322 |
| H19 | 9.140977859  | 13.00431824 | 1.930357814 |
| H20 | 14.56747055  | 10.68903828 | 1.080353379 |
| H21 | 12.66638565  | 12.28291893 | 0.730287015 |
| H22 | 15.02493763  | 15.4847517  | 2.434840918 |
| H23 | 16.97394943  | 13.88851643 | 2.682936668 |
| H24 | 11.44507027  | 13.14984989 | 2.185630322 |
| H25 | 19.96001816  | 1.414157748 | 1.930357814 |
| H26 | 19.25185967  | 7.271278858 | 1.080353379 |
| H27 | 18.82204628  | 4.827980518 | 0.730287015 |
| H28 | 14.86991882  | 5.269598961 | 2.434840918 |
| H29 | 15.27777672  | 7.755642414 | 2.682936668 |
| H30 | 18.68191719  | 3.336825848 | 2.185630322 |
| H31 | 24.58787346  | 16.5788002  | 1.930357814 |
| H32 | 19.86953354  | 13.03695869 | 1.080353379 |
| H33 | 22.20038223  | 13.88640785 | 0.730287015 |
| H34 | 23.79401016  | 10.24292564 | 2.434840918 |
| H35 | 21.43708611  | 9.353149414 | 2.682936668 |
| H36 | 23.56182098  | 14.51063061 | 2.185630322 |
| H37 | 11.04050732  | 16.89258575 | 1.868604183 |
| H38 | 15.64291191  | 1.115065098 | 1.868604183 |
| H39 | 27.00544357  | 12.98962593 | 1.868604183 |
| H40 | 6.855783463  | 14.10469055 | 1.868604183 |

|     |              |             |             |
|-----|--------------|-------------|-------------|
| H41 | 2.253376007  | 29.88221169 | 1.868604183 |
| H42 | -9.109155655 | 18.00765038 | 1.868604183 |

Eclipsed mode --- TAPT-DHTA-COF

| Atom | x            | y           | z           |
|------|--------------|-------------|-------------|
| C1   | 0.943060875  | 19.75136185 | 2.021702051 |
| C2   | 2.004306793  | 18.75020599 | 1.899740815 |
| C3   | 3.231724739  | 19.16475678 | 1.353739738 |
| C4   | 4.260090828  | 18.25086594 | 1.210954905 |
| C5   | 4.094885826  | 16.92084694 | 1.661845803 |
| C6   | 2.840568542  | 16.48735428 | 2.137203693 |
| C7   | 1.797935486  | 17.40239143 | 2.253024817 |
| C8   | 6.31075573   | 16.58277702 | 1.955345035 |
| C9   | 7.616603851  | 15.96591282 | 1.905917287 |
| C10  | 8.709261894  | 16.85822296 | 1.917523026 |
| C11  | 10.03148842  | 16.42969322 | 1.869673967 |
| C12  | 0.321925163  | 21.94238281 | 2.021702051 |
| C13  | 0.658348083  | 23.3619976  | 1.899740815 |
| C14  | -0.314372063 | 24.21769714 | 1.353739738 |
| C15  | -0.037121773 | 25.56526375 | 1.210954905 |
| C16  | 1.197311401  | 26.08720207 | 1.661845803 |
| C17  | 2.199903488  | 25.21764565 | 2.137203693 |
| C18  | 1.928756714  | 23.85721397 | 2.253024817 |
| C19  | 0.382154465  | 28.17523575 | 1.955345035 |
| C20  | 0.263450623  | 29.6145668  | 1.905917287 |
| C21  | -1.055644989 | 30.11468124 | 1.917523026 |
| C22  | 16.5530014   | 0.472677588 | 1.869673967 |
| C23  | -1.264985085 | 20.30895233 | 2.021702051 |
| C24  | -2.662602425 | 19.89046669 | 1.899740815 |
| C25  | -2.917299271 | 18.62021637 | 1.353739738 |
| C26  | -4.222969055 | 18.18656921 | 1.210954905 |
| C27  | -5.292198181 | 18.99464989 | 1.661845803 |
| C28  | -5.040418148 | 20.29767036 | 2.137203693 |
| C29  | -3.726693153 | 20.74309731 | 2.253024817 |
| C30  | -6.692909241 | 17.24468613 | 1.955345035 |
| C31  | -7.880055428 | 16.42222214 | 1.905917287 |
| C32  | -7.653618813 | 15.02979565 | 1.917523026 |
| C33  | 27.11142731  | 14.09897995 | 1.869673967 |
| C34  | 16.95557404  | 11.24998665 | 2.021702051 |
| C35  | 15.89433098  | 12.25114441 | 1.899740815 |
| C36  | 14.66691399  | 11.83659458 | 1.353739738 |

|     |              |             |             |
|-----|--------------|-------------|-------------|
| C37 | 13.63854694  | 12.75048351 | 1.210954905 |
| C38 | 13.80375195  | 14.08050251 | 1.661845803 |
| C39 | 15.05807209  | 14.51399517 | 2.137203693 |
| C40 | 16.10070229  | 13.59895897 | 2.253024817 |
| C41 | 11.58788204  | 14.41857338 | 1.955345035 |
| C42 | 10.28203487  | 15.03543854 | 1.905917287 |
| C43 | 9.189376831  | 14.14312553 | 1.917523026 |
| C44 | 7.867149353  | 14.57165718 | 1.869673967 |
| C45 | 17.57671356  | 9.058966637 | 2.021702051 |
| C46 | 17.2402916   | 7.639352798 | 1.899740815 |
| C47 | 18.21300888  | 6.783653259 | 1.353739738 |
| C48 | 17.9357605   | 5.436086655 | 1.210954905 |
| C49 | 16.70132637  | 4.914147854 | 1.661845803 |
| C50 | 15.69873238  | 5.783704758 | 2.137203693 |
| C51 | 15.96988106  | 7.144136906 | 2.253024817 |
| C52 | 17.51648331  | 2.826113939 | 1.955345035 |
| C53 | 17.63518906  | 1.386783361 | 1.905917287 |
| C54 | 18.95428085  | 0.886669636 | 1.917523026 |
| C55 | 1.345636368  | 30.52867317 | 1.869673967 |
| C56 | 19.16362381  | 10.69239616 | 2.021702051 |
| C57 | 20.56123924  | 11.11088371 | 1.899740815 |
| C58 | 20.81593704  | 12.38113403 | 1.353739738 |
| C59 | 22.12160683  | 12.81478024 | 1.210954905 |
| C60 | 23.19083405  | 12.00669861 | 1.661845803 |
| C61 | 22.93905449  | 10.70368099 | 2.137203693 |
| C62 | 21.62533188  | 10.25825405 | 2.253024817 |
| C63 | 24.59154511  | 13.75666332 | 1.955345035 |
| C64 | 25.77869415  | 14.57912922 | 1.905917287 |
| C65 | 25.55225754  | 15.97155476 | 1.917523026 |
| C66 | -9.212786674 | 16.90237045 | 1.869673967 |
| N1  | 1.338799477  | 21.05149651 | 2.034480095 |
| N2  | 5.179184914  | 16.02466011 | 1.653328419 |
| N3  | -1.001876831 | 21.63500595 | 2.034480095 |
| N4  | 1.431282997  | 27.47432709 | 1.653328419 |
| N5  | -0.336870193 | 19.31616592 | 2.034480095 |
| N6  | -6.610467434 | 18.50371361 | 1.653328419 |
| N7  | 16.55983734  | 9.94985199  | 2.034480095 |
| N8  | 12.71945095  | 14.97669029 | 1.653328419 |
| N9  | 18.9005146   | 9.366345406 | 2.034480095 |
| N10 | 16.46735764  | 3.527023554 | 1.653328419 |
| N11 | 18.23550797  | 11.68518353 | 2.034480095 |
| N12 | 24.50910568  | 12.49763584 | 1.653328419 |
| H1  | 8.489609718  | 17.93669891 | 1.948562145 |

|     |              |             |             |
|-----|--------------|-------------|-------------|
| H2  | 3.338006973  | 20.20410729 | 1.025517941 |
| H3  | 5.196117401  | 18.548666   | 0.725635231 |
| H4  | 2.732460022  | 15.4458952  | 2.461974621 |
| H5  | 0.82188797   | 17.10223579 | 2.650525331 |
| H6  | 6.343832016  | 17.65195084 | 2.268310308 |
| H7  | 10.73404694  | 18.20923233 | 1.923866749 |
| H8  | -1.879805565 | 29.38521957 | 1.948562145 |
| H9  | -1.267635345 | 23.79009438 | 1.025517941 |
| H10 | -0.763019562 | 26.22695541 | 0.725635231 |
| H11 | 3.155869484  | 25.64478302 | 2.461974621 |
| H12 | 2.676722527  | 23.16200829 | 2.650525331 |
| H13 | -0.560317039 | 27.66929436 | 2.268310308 |
| H14 | 14.66059494  | 0.191340327 | 1.923866749 |
| H15 | -6.609806061 | 14.68078232 | 1.948562145 |
| H16 | -2.070370674 | 18.00849915 | 1.025517941 |
| H17 | -4.43304491  | 17.22704697 | 0.725635231 |
| H18 | -5.88833046  | 20.91202354 | 2.461974621 |
| H19 | -3.498610497 | 21.73845673 | 2.650525331 |
| H20 | -5.783515453 | 16.68145561 | 2.268310308 |
| H21 | 28.30127335  | 12.60077763 | 1.923866749 |
| H22 | 9.409029007  | 13.06465149 | 1.948562145 |
| H23 | 14.5606308   | 10.79724312 | 1.025517941 |
| H24 | 12.70252037  | 12.4526844  | 0.725635231 |
| H25 | 15.16617966  | 15.55545425 | 2.461974621 |
| H26 | 17.07675171  | 13.89911366 | 2.650525331 |
| H27 | 11.55480576  | 13.34939861 | 2.268310308 |
| H28 | 7.164592266  | 12.79211807 | 1.923866749 |
| H29 | 19.77844238  | 1.616131425 | 1.948562145 |
| H30 | 19.16627312  | 7.211255074 | 1.025517941 |
| H31 | 18.66165543  | 4.774394035 | 0.725635231 |
| H32 | 14.74276829  | 5.356568336 | 2.461974621 |
| H33 | 15.22191429  | 7.839342594 | 2.650525331 |
| H34 | 18.45895386  | 3.332056284 | 2.268310308 |
| H35 | 3.238042831  | 30.81001091 | 1.923866749 |
| H36 | 24.50844574  | 16.32056809 | 1.948562145 |
| H37 | 19.9690094   | 12.99285221 | 1.025517941 |
| H38 | 22.33168411  | 13.77430248 | 0.725635231 |
| H39 | 23.78696823  | 10.08932781 | 2.461974621 |
| H40 | 21.39724922  | 9.262893677 | 2.650525331 |
| H41 | 23.6821537   | 14.31989574 | 2.268310308 |
| H42 | -10.40263557 | 18.40057373 | 1.923866749 |
| O1  | 11.08971024  | 17.30823898 | 1.827961802 |
| O2  | 15.26304531  | 0.94985038  | 1.827961802 |

|    |             |             |             |
|----|-------------|-------------|-------------|
| O3 | 27.34315682 | 12.74326038 | 1.827961802 |
| O4 | 6.80892849  | 13.69311047 | 1.827961802 |
| O5 | 2.635591507 | 30.05150032 | 1.827961802 |
| O6 | -9.44452095 | 18.25808907 | 1.827961802 |

Eclipsed mode --- TAPT-DMTA-COF

| Atom | x            | y           | z           |
|------|--------------|-------------|-------------|
| C1   | 1.117768288  | 19.84981537 | 1.926617384 |
| C2   | 2.300260544  | 19.06910324 | 1.921570659 |
| C3   | 3.433720589  | 19.54314995 | 1.366328359 |
| C4   | 4.539008141  | 18.82204056 | 1.375763416 |
| C5   | 4.535620689  | 17.59383774 | 1.917986751 |
| C6   | 3.410006523  | 17.10434914 | 2.438304901 |
| C7   | 2.312027931  | 17.83564949 | 2.464159966 |
| C8   | 6.797904968  | 17.17321587 | 1.78395772  |
| C9   | 7.861289978  | 16.26341248 | 1.785786271 |
| C10  | 9.095132828  | 16.74580193 | 1.781361222 |
| C11  | 10.14889336  | 15.940382   | 1.78209269  |
| C12  | 11.39129448  | 17.40607071 | 1.764429331 |
| C13  | 0.080770493  | 21.92574501 | 1.926617384 |
| C14  | 0.165641785  | 23.34017181 | 1.921570659 |
| C15  | -0.811626434 | 24.08475113 | 1.366328359 |
| C16  | -0.739770889 | 25.4025135  | 1.375763416 |
| C17  | 0.325577736  | 26.0136795  | 1.917986751 |
| C18  | 1.31229496   | 25.28361511 | 2.438304901 |
| C19  | 1.227958679  | 23.9670887  | 2.464159966 |
| C20  | -0.441295624 | 28.18318749 | 1.78395772  |
| C21  | -0.18507576  | 29.55900765 | 1.785786271 |
| C22  | -1.21975708  | 30.38635254 | 1.781361222 |
| C23  | 16.78097534  | 0.819007576 | 1.78209269  |
| C24  | 14.89045143  | 1.162113667 | 1.764429331 |
| C25  | -1.19853878  | 19.98971176 | 1.926617384 |
| C26  | -2.465902328 | 19.3560009  | 1.921570659 |
| C27  | -2.622095108 | 18.13737297 | 1.366328359 |
| C28  | -3.799236774 | 17.54071999 | 1.375763416 |
| C29  | -4.861198425 | 18.1577549  | 1.917986751 |
| C30  | -4.722301483 | 19.3773098  | 2.438304901 |
| C31  | -3.539987087 | 19.96253586 | 2.464159966 |
| C32  | -6.356608391 | 16.4088707  | 1.78395772  |
| C33  | -7.676214695 | 15.94285297 | 1.785786271 |
| C34  | -7.875376225 | 14.63312054 | 1.781361222 |

|     |              |             |             |
|-----|--------------|-------------|-------------|
| C35 | 26.56042862  | 14.1232481  | 1.78209269  |
| C36 | 27.20855331  | 12.31445217 | 1.764429331 |
| C37 | 16.71232987  | 11.03282261 | 1.926617384 |
| C38 | 15.52983761  | 11.81353569 | 1.921570659 |
| C39 | 14.39637947  | 11.33948612 | 1.366328359 |
| C40 | 13.29109001  | 12.06059551 | 1.375763416 |
| C41 | 13.29447842  | 13.28879833 | 1.917986751 |
| C42 | 14.42009163  | 13.77828884 | 2.438304901 |
| C43 | 15.51806831  | 13.04698753 | 2.464159966 |
| C44 | 11.03219509  | 13.7094202  | 1.78395772  |
| C45 | 9.968809128  | 14.61922264 | 1.785786271 |
| C46 | 8.734965324  | 14.13683605 | 1.781361222 |
| C47 | 7.681207657  | 14.94225502 | 1.78209269  |
| C48 | 6.43880558   | 13.47656536 | 1.764429331 |
| C49 | 17.74932861  | 8.95689106  | 1.926617384 |
| C50 | 17.66445923  | 7.54246664  | 1.921570659 |
| C51 | 18.64172554  | 6.797885895 | 1.366328359 |
| C52 | 18.56987     | 5.480123997 | 1.375763416 |
| C53 | 17.50452042  | 4.868956089 | 1.917986751 |
| C54 | 16.51780319  | 5.599021912 | 2.438304901 |
| C55 | 16.60214043  | 6.915548801 | 2.464159966 |
| C56 | 18.27139282  | 2.699451447 | 1.78395772  |
| C57 | 18.01517487  | 1.323629856 | 1.785786271 |
| C58 | 19.04985809  | 0.496284008 | 1.781361222 |
| C59 | 1.049123764  | 30.06362915 | 1.78209269  |
| C60 | 2.939647675  | 29.72052193 | 1.764429331 |
| C61 | 19.02863884  | 10.89292336 | 1.926617384 |
| C62 | 20.29600143  | 11.52663517 | 1.921570659 |
| C63 | 20.45219231  | 12.74526405 | 1.366328359 |
| C64 | 21.62933731  | 13.34191704 | 1.375763416 |
| C65 | 22.69129753  | 12.72488117 | 1.917986751 |
| C66 | 22.5524025   | 11.50532723 | 2.438304901 |
| C67 | 21.37008667  | 10.92010021 | 2.464159966 |
| C68 | 24.18670654  | 14.47376537 | 1.78395772  |
| C69 | 25.50631332  | 14.93978405 | 1.785786271 |
| C70 | 25.70547485  | 16.24951744 | 1.781361222 |
| C71 | -8.730330467 | 16.75938988 | 1.78209269  |
| C72 | -9.378454208 | 18.56818581 | 1.764429331 |
| N1  | 1.179282188  | 21.17745972 | 1.927312136 |
| N2  | 5.636094093  | 16.79953766 | 1.919449568 |
| N3  | -1.099759102 | 21.31519508 | 1.927312136 |
| N4  | 0.463225365  | 27.36386871 | 1.919449568 |
| N5  | -0.079522133 | 19.27261734 | 1.927312136 |



|     |              |             |             |
|-----|--------------|-------------|-------------|
| N6  | -6.099319935 | 17.60186768 | 1.919449568 |
| N7  | 16.65081596  | 9.705177307 | 1.927312136 |
| N8  | 12.19400501  | 14.08310032 | 1.919449568 |
| N9  | 18.92985916  | 9.567440987 | 1.927312136 |
| N10 | 17.3668747   | 3.518767595 | 1.919449568 |
| N11 | 17.90962029  | 11.61001873 | 1.927312136 |
| N12 | 23.92941856  | 13.28076935 | 1.919449568 |
| H1  | 9.241341591  | 17.75875092 | 1.77839911  |
| H2  | 3.469559669  | 20.45635033 | 0.877387464 |
| H3  | 5.374526024  | 19.21486855 | 0.908545077 |
| H4  | 3.392533302  | 16.15995789 | 2.86010313  |
| H5  | 1.48738575   | 17.43510056 | 2.946189165 |
| H6  | 7.016324043  | 18.16918182 | 1.710086346 |
| H7  | 11.44513989  | 17.77975273 | 0.688722789 |
| H8  | 12.30740547  | 17.76739883 | 2.338614941 |
| H9  | 10.44790459  | 17.8109436  | 2.260318756 |
| H10 | -2.170101166 | 30.00649643 | 1.77839911  |
| H11 | -1.620398521 | 23.65918732 | 0.877387464 |
| H12 | -1.497728348 | 25.92967987 | 0.908545077 |
| H13 | 2.138897896  | 25.74067879 | 2.86010313  |
| H14 | 1.987164497  | 23.45320129 | 2.946189165 |
| H15 | -1.413035393 | 27.87435913 | 1.710086346 |
| H16 | 14.53973198  | 1.022215366 | 0.688722789 |
| H17 | 14.11947632  | 1.774825215 | 2.338614941 |
| H18 | 15.01151657  | 0.142677784 | 2.260318756 |
| H19 | -7.071239471 | 14.00002575 | 1.77839911  |
| H20 | -1.849160194 | 17.6497364  | 0.877387464 |
| H21 | -3.87679863  | 16.62072754 | 0.908545077 |
| H22 | -5.531431675 | 19.86463928 | 2.86010313  |
| H23 | -3.474552155 | 20.8769722  | 2.946189165 |
| H24 | -5.603286266 | 15.72173309 | 1.710086346 |
| H25 | 27.50489044  | 12.08097839 | 0.688722789 |
| H26 | 27.06341553  | 11.34041309 | 2.338614941 |
| H27 | 28.03087807  | 12.92901611 | 2.260318756 |
| H28 | 8.588759422  | 13.12388516 | 1.77839911  |
| H29 | 14.36054134  | 10.42628765 | 0.877387464 |
| H30 | 12.45557404  | 11.66776943 | 0.908545077 |
| H31 | 14.43756676  | 14.72267914 | 2.86010313  |
| H32 | 16.3427124   | 13.44753552 | 2.946189165 |
| H33 | 10.81377602  | 12.7134552  | 1.710086346 |
| H34 | 6.384958744  | 13.10288525 | 0.688722789 |
| H35 | 5.522695541  | 13.11523819 | 2.338614941 |
| H36 | 7.38219595   | 13.07169342 | 2.260318756 |

|     |              |             |             |
|-----|--------------|-------------|-------------|
| H37 | 20.00020027  | 0.876140416 | 1.77839911  |
| H38 | 19.45049858  | 7.223448753 | 0.877387464 |
| H39 | 19.32782745  | 4.95295763  | 0.908545077 |
| H40 | 15.69120026  | 5.14195919  | 2.86010313  |
| H41 | 15.84293556  | 7.42943573  | 2.946189165 |
| H42 | 19.24313355  | 3.008277655 | 1.710086346 |
| H43 | 3.290367126  | 29.86042213 | 0.688722789 |
| H44 | 3.710622787  | 29.10781097 | 2.338614941 |
| H45 | 2.818582535  | 30.73995781 | 2.260318756 |
| H46 | 24.90133667  | 16.88261223 | 1.77839911  |
| H47 | 19.67925644  | 13.23290157 | 0.877387464 |
| H48 | 21.70689774  | 14.26191044 | 0.908545077 |
| H49 | 23.36153221  | 11.0179987  | 2.86010313  |
| H50 | 21.30465126  | 10.00566483 | 2.946189165 |
| H51 | 23.43338585  | 15.16090393 | 1.710086346 |
| H52 | -9.674790382 | 18.80165863 | 0.688722789 |
| H53 | -9.233317375 | 19.54222488 | 2.338614941 |
| H54 | -10.20077896 | 17.95362282 | 2.260318756 |
| O1  | 11.36864948  | 16.44902039 | 1.769146919 |
| O2  | 15.73060608  | 1.621029615 | 1.769146919 |
| O3  | 26.39104271  | 12.81258869 | 1.769146919 |
| O4  | 6.461449623  | 14.43361855 | 1.769146919 |
| O5  | 2.099494934  | 29.26160812 | 1.769146919 |
| O6  | -8.560943604 | 18.07004929 | 1.769146919 |

Reference:

- [1] a) S. Shanmugam, J. Xu, C. Boyer, *J. Am. Chem. Soc.* **2015**, 137, 9174-9185; b) C. Lv, C. He, X. Pan, *Angew. Chem. Int. Ed.* **2018**, 57, 9430-9433; c) A. Reyhani, H. Ranji-Burachaloo, T. G. McKenzie, Q. Fu, G. G. Qiao, *Macromolecules* **2019**, 52, 3278-3287; d) J. Xu, S. Shanmugam, H. T. Duong, C. Boyer, *Polym. Chem.* **2015**, 6, 5615-5624.
- [2] a) G. Kresse, J. Furthmüller, *Phys. Rev. B* **1996**, 54, 11169–11186; b) G. Kresse, D. Joubert, *Phys. Rev. B* **1999**, 59, 1758–1775; c) J.P. Perdew, K. Burke, M. Ernzerhof, *Phys. Rev. Lett.* **1996**, 77, 18, 3865–3868; d) H. J. Monkhorst, J. D. Pack, *Phys. Rev. B* **1976**, 13, 5188-5192.
